# Supplementary material
Source: Research Square preprint supplement (doi:10.21203/rs.3.rs-9828967/v1)
Supplement: Supplementary file 1 [file 8f2e7feb27b9052fa77f8125.docx]

**Highlights**

- A multi-state LSTM (NLSTM) model is utilized for time-series forecasting of water quality parameters.
- NLSTM aggregates multiple historical hidden states to capture long-range temporal dependencies.
- Robust performance is demonstrated under both temporal and spatiotemporal transferability frameworks.
- **Improved forecasting performance of the model is demonstrated for pH, turbidity, and conductivity.**
